32. Spahn DR, Moch H, Hofmann A, Isbister JP: Patient blood management: The pragmatic solution for the problems with blood transfusions (editorial). *ANESTHESIOLOGY* 2008; 109:951-3
33. Fahy BG, Sheehy AM, Coursin DB: Perioperative glucose control: What is enough? *ANESTHESIOLOGY* 2009; 110:204-6
34. Nunnally ME, O'Connor MF: Glycemic control for organs: A new approach to a controversial topic. *ANESTHESIOLOGY* 2009; 110:207-8
35. Lanier WL, Pasternak JJ: Refining perioperative glucose management in patients experiencing, or at risk for, ischemic brain injury. *ANESTHESIOLOGY* 2009; 110: 456-8
36. Kehlet H, Bundgaard-Nielsen M: Goal-directed perioperative fluid management: Why, when, and how? *ANESTHESIOLOGY* 2009; 110:453-5
37. Maze M, Cibelli M, Grocott HP: Taking the lead in research into postoperative cognitive dysfunction. *ANESTHESIOLOGY* 2008; 108:1-2
38. Patel P, Sun L: Update on neonatal anesthetic neurotoxicity: Insight into molecular mechanisms and relevance to humans. *ANESTHESIOLOGY* 2009; 110:703-8
39. Perouansky M, Hemmings HC: Between Clotho and Lachesis: How isoflurane seals neuronal fate. *ANESTHESIOLOGY* 2009; 110:709-11
40. Devereaux PJ, Yang H, Yusuf S, Guyatt G, Leslie K, Villar JC, Xavier D, Chrolavicius S, Greenspan L, Pogue J, Pais P, Liu L, Xu S, Malaga G, Avezum A, Chan M, Montori VM, Jacka M, Choi P: Effects of extended-release metoprolol succinate in patients undergoing non-cardiac surgery (POISE trial): A randomised controlled trial. *Lancet* 2008; 371:1839-47

## ANESTHESIOLOGY REFLECTIONS

### Hingson's Peace Gun

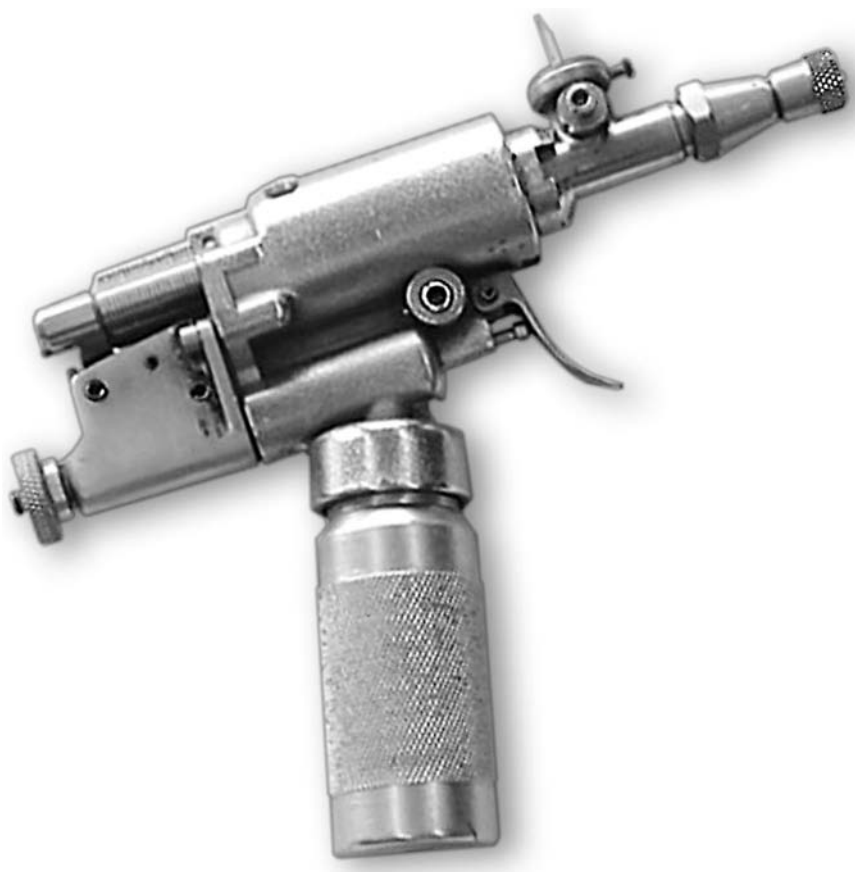

Familiar with jet-injection injuries from his military background, Anesthesiologist Robert A. Hingson, M.D. (1913–1996) published about needle-free injection as early as 1947. By the following year, Hingson had penned papers about his “Hypospray” device, nearly 20 years before Hyposprays were featured on television’s *Star Trek* and then in more than a dozen unrelated science fiction movies. Surprisingly, this handheld version of a Hingson “Peace Gun” pictured above—with its luger-like metal silhouette and sharp bottle piercer—went unchallenged through airport security x-ray machines as it was curatorially hand-carried to the gallery of the Wood Library-Museum. Facilitated by patent innovations in the 1960s by Aaron Ismach and others, Hingson and his Cleveland and Pittsburgh colleagues popularized jet injection technologies which have immunized more than a billion people and eradicated smallpox worldwide. (Copyright © the American Society of Anesthesiologists, Inc. This image appears in color in the *Anesthesiology Reflections* online collection available at [www.anesthesiology.org](http://www.anesthesiology.org).)

George S. Bause, M.D., M.P.H., Honorary Curator, ASA’s Wood Library-Museum of Anesthesiology, Park Ridge, Illinois, and Clinical Associate Professor, Case Western Reserve University, Cleveland, Ohio. [UJYC@aol.com](mailto:UJYC@aol.com).
